# Supplementary material
Source: publisher figshare collection journal article supplement (https://karger.figshare.com/ndownloader/files/14283641)
Supplement: Supplementary file 1 [file 14283641]

**Supplementary material 2**

The use of phosphorous binders within 3 months

|  | **Calcium agent** | **Non-Calcium agent** | **subtotal** |
| --- | --- | --- | --- |
| FF group | **5** | **54** | **59** |
| Control group | **30** | **265** | **295** |
| subtotal | **35** | **319** | **354** |

*Total comparison：χ2=0.025，P=0.873*
